# Supplementary material for: Wolfram Syndrome in the Japanese Population; Molecular Analysis of WFS1 Gene and Characterization of Clinical Features
Source: PubMed Central journal article supplement (PMC4161373; doi:10.1371/journal.pone.0106906), 2014-09-11
Supplement: pone.0106906.s001.pdf [file pone.0106906.s001.pdf]

**Figure S1.** Multiplex Ligation–dependent Probe Amplification (MLPA) analysis.

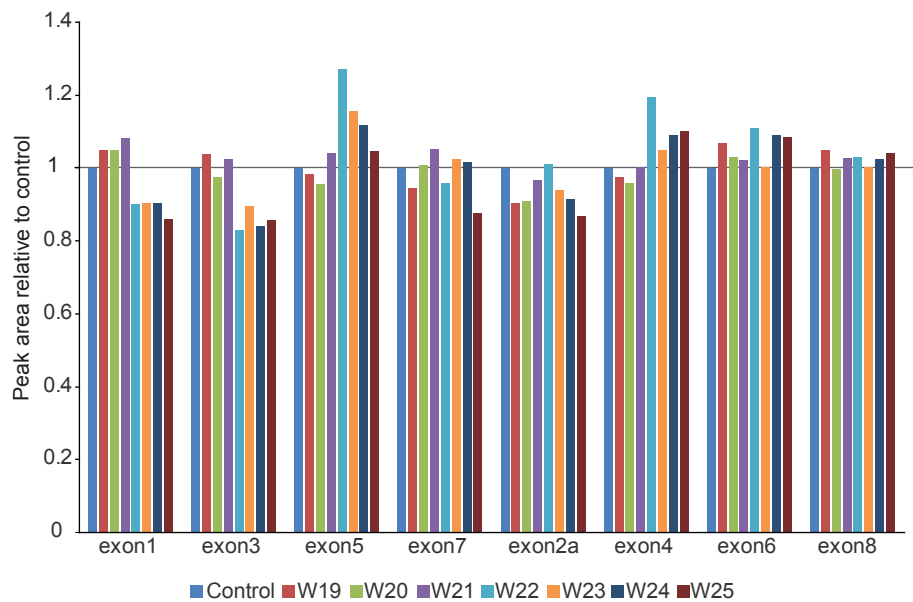

**Figure S2.** Age at onset of both DM and OA in each patient in three genotypic classes.

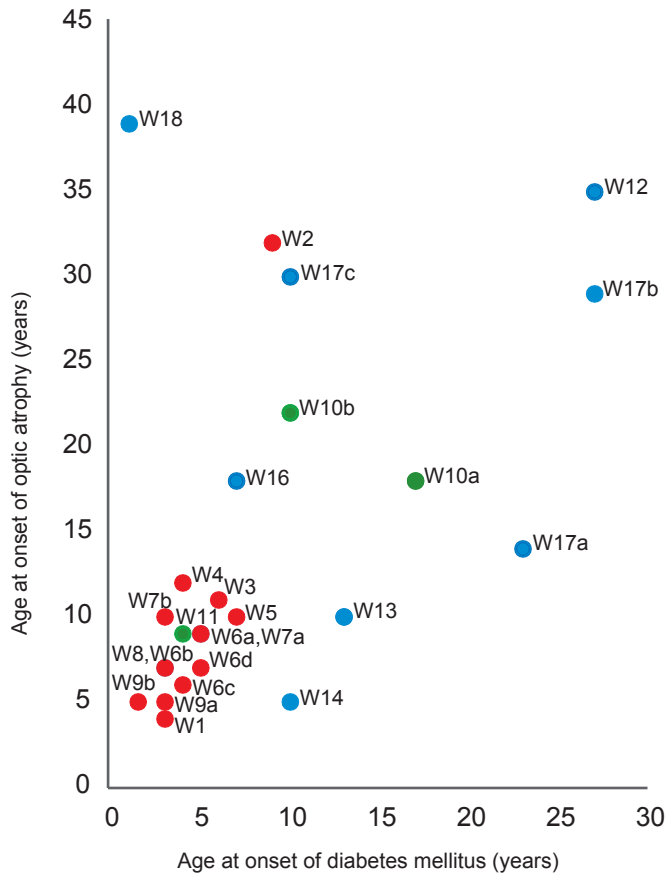

**Table S1.** PCR and sequencing primers for *WFS1* gene

| Exon | Forward primer(5'-3')      | Reverse primer(5'-3')     |
|------|----------------------------|---------------------------|
| 1    | TGGAGTGATTGGCGGCTACA       | AGGCCCGAGGAGGACAGTGC      |
| 2    | CTGTCTCCAGCAGACACTAAGTGCCA | CCCACCCAGCTATCCCTGAACATCC |
| 3    | CTGAAGACCCTCATGCCTTG       | ACACTTCTCTGTGGGCTGTG      |
| 4    | TCGGAGAATCTGGAGGCTGA       | CATTACAAGCTGCTCAACCC      |
| 5    | CGAAAGCCTTCCAGGCAGAG       | CTATGGGAAGGTCCTGGCTC      |
| 6    | CTAGGAACAGTGCGCCAGTT       | ATGGAGTCGCACAGGAAGGA      |
| 7    | GCCCATGCTGTTTTCTCTCA       | CCGAGGACACATCCTTATGA      |
| 8(a) | GCGTGAGATGGGAGCAGTGG       | CTGGCGATGGGGAAGGAGAA      |
| 8(b) | TCCGCACCCTCACCGACCTG       | CACACCAGGTAGGGCACAAG      |
| 8(c) | CCTGGTCGTCCTCAATGTCA       | CATAGAACCAGCAGAACAGC      |
| 8(d) | CCGTGGCGGTCTGTAGTGTGC      | CCCACGGTAATCTCAAACCT      |
| 8(e) | CTGGATGCGCTGCCTCTACG       | CATGGCAAGATGCACTGGAAGC    |

**Table S2.** DNA probes corresponding to the indicated mutations in *WFS1* for TaqMan PCR analysis

| Mutation | Forward primer (5'-3')  | Reverse primer (5'-3') | Probe-VIC           | Probe-FAM         | n   |
|----------|-------------------------|------------------------|---------------------|-------------------|-----|
| E809K    | GACGTCACCAAGGACATCGT    | CTCCAGGATGGTGCTGAACTC  | CCAGCAGCGAGTTCA     | CAGCAGCAAGTTCA    | 100 |
| Del193K  | TGGTCATGTACTGGAAGCTCAAC | TTGACCTGGCCGACATTCTC   | CAAGAAGAAGAAGCAGGTG | CCAAGAAGAAGCAGGTG | 100 |
| V248G    | AAGAACTACATCGCGCTGGAT   | CGCCCTTGGCGTACTTCTTAG  | TGATCTCCACAAAGTC    | ATCTCCCCAAAGTC    | 183 |

**Table S3.** The list of detectable polymorphism in *WFS1*.

| Exon | Nucleotide change | Aminoacid change | 1000 Genomes |
|------|-------------------|------------------|--------------|
| 8    | 1234G>C           | p.V412L          | rs149865710  |
| 8    | 1367G>A           | p.R456H          | rs1801208    |
| 8    | 1726G>A           | p.G576S          | rs1805069    |
| 8    | 1832G>A           | p.R611H          | rs734312     |
| 8    | 2158A>G           | p.I720V          | rs1805070    |
| 8    | 2369C>T           | p.S790L          | not reported |
| 8    | 2469C>T           | p.I823I          | rs181025     |
| 8    | 2596G>A           | p.D866N          | rs3821945    |

**Table S4.** *In Silico* scores and predictions of functional consequences of non-synonymous variants of *WFS1*.

| Programs | PolyPhen-2                 | SIFT                |
|----------|----------------------------|---------------------|
|          | HumVar Score<br>Prediction | Score<br>Prediction |
| p.N188S  | 0.166<br>Benign            | 0.55<br>Tolerated   |
| p.V248G  | 0.975<br>Probably damaging | 0<br>Damaging       |
| p.L303P  | 0.998<br>Probably damaging | 0<br>Damaging       |
| p.I427N  | 0.809<br>Possibly damaging | 0<br>Damaging       |
| p.L432R  | 0.999<br>Probably damaging | 0<br>Damaging       |
| p.M518V  | 0.526<br>Possibly damaging | 0.18<br>Tolerated   |
| p.G674R  | 0.999<br>Probably damaging | 0.03<br>Damaging    |
| p.P724L  | 1<br>Probably damaging     | 0<br>Damaging       |
| p.G736D  | 1<br>Probably damaging     | 0<br>Damaging       |
| p.E809K  | 0.934<br>Probably damaging | 0<br>Damaging       |

Polyphen2 computes both HumDiv score and HumVar score to predict deleterious effects of amino acid substitutions. HumVar is preferred model for diagnosis of Mendelian disease. Regarding SIFT, amino acid substitutions with scores <0.05 are predicted to be deleterious.
